# Supplementary material for: Neuromuscular Characteristics of Unilateral and Bilateral Maximal Voluntary Isometric Contractions following ACL Reconstruction
Source: MDPI journal article supplement (doi:10.3390/biology12091173), 2023-08-26
Supplement: s1 [file s1]

# Neuromuscular Characteristics of Unilateral and Bilateral Maximal Voluntary Isometric Contractions following ACL Reconstruction

Riccardo Di Giminiani <sup>1,\*</sup>, Stefano Marinelli<sup>1</sup>, Stefano La Greca<sup>1</sup>, Andrea Di Blasio<sup>2</sup>, Massimo Angelozzi<sup>3</sup>, Angelo Cacchio<sup>3</sup>

1. Department of Biotechnological and Applied Clinical Sciences, University of L'Aquila, Italy
2. Department of Medicine and Aging Sciences 'G. D'Annunzio' University of Chieti-Pescara, Italy
3. Department of Life, Health and Environmental Sciences, University of L'Aquila, Italy

## Supplementary Materials

### List of content:

- **Table S1** ICCs (95% confidence limit, lower limit-LL, upper limit-UL) of MVICs and RFD values.
- **Table S2** ICCs (95% confidence limit, lower limit-LL, upper limit-UL) of sEMG values recorded during unilateral MVICs and RFD
- **Table S3** ICCs (95% confidence limit, lower limit-LL, upper limit-UL) of sEMG values recorded during bilateral MVICs.

**Table S1.** ICCs (95% confidence limit, lower limit-LL, upper limit-UL) of MVICs and RFD values.

| Group | Variable | UL                  |                         |                  |                  | BL               |
|-------|----------|---------------------|-------------------------|------------------|------------------|------------------|
|       |          | <i>Operated Leg</i> | <i>Non-Operated Leg</i> | <i>RL</i>        | <i>LL</i>        |                  |
| ACL   | MVICs    | 0.95 (0.85-0.98)    | 0.98 (0.93-0.99)        | NA               | NA               | 0.99 (0.98-1)    |
|       | RFD      | 0.88 (0.67-0.96)    | 0.83 (0.48-0.93)        | NA               | NA               | 0.87 (0.65-0.96) |
| CG    | MIVCs    | NA                  | NA                      | 0.99 (0.95-1)    | 0.83 (0.40-0.96) | 0.94 (0.82-0.98) |
|       | RFD      | NA                  | NA                      | 0.92 (0.77-0.97) | 0.85 (0.59-0.95) | 0.95 (0.84-0.98) |

Abbreviations: unilateral (UL), bilateral (BL), maximal voluntary isometric contractions (MVICs), rate of force development (RFD), right leg (RL), and left leg (LL)

**Table S2.** ICCs (95% confidence limit, lower limit-LL, upper limit-UL) of sEMG values recorded during unilateral MVICs and RFD.

| Variable                                     | ACL Group           |                         | Control Group       |                  |
|----------------------------------------------|---------------------|-------------------------|---------------------|------------------|
|                                              | Unilateral Exercise |                         | Unilateral Exercise |                  |
|                                              | <i>Operated Leg</i> | <i>Non-Operated Leg</i> | <i>Right Leg</i>    | <i>Left Leg</i>  |
| <b>sEMG<sub>GRMS</sub> relative to MVICs</b> |                     |                         |                     |                  |
| <b>VL</b>                                    | 0.91 (0.77-0.97)    | 0.95 (0.87-0.98)        | 0.88 (0.66-0.96)    | 0.94 (0.82-0.98) |
| <b>VM</b>                                    | 0.74 (0.43-0.91)    | 0.91 (0.74-0.97)        | 0.91 (0.75-0.97)    | 0.92 (0.78-0.98) |
| <b>RF</b>                                    | 0.94 (0.83-0.98)    | 0.93 (0.78-0.98)        | 0.93 (0.79-0.98)    | 0.98 (0.93-0.99) |
| <b>BF</b>                                    | 0.94 (0.80-0.98)    | 0.80 (0.48-0.93)        | 0.98 (0.94-0.99)    | 0.90 (0.71-0.97) |
| <b>sEMG<sub>GRMS</sub> relative to RFD</b>   |                     |                         |                     |                  |
| <b>VL</b>                                    | 0.89 (0.57-0.87)    | 0.98 (0.93-0.99)        | 0.95 (0.85-0.98)    | 0.89 (0.68-0.96) |
| <b>VM</b>                                    | 0.88 (0.53-0.93)    | 0.91 (0.75-0.97)        | 0.91 (0.75-0.97)    | 0.89 (0.70-0.97) |
| <b>RF</b>                                    | 0.87 (0.59-0.96)    | 0.84 (0.55-0.95)        | 0.80 (0.49-0.93)    | 0.80 (0.48-0.93) |
| <b>BF</b>                                    | 0.72 (0.39-0.90)    | 0.87 (0.65-0.96)        | 0.95 (0.86-0.99)    | 0.85 (0.60-0.95) |

Abbreviations: maximal voluntary isometric contractions (MVICs), vastus lateralis (VL), vastus medialis (VM), rectus femoris (RF), biceps femoris (BF) and rate of force development (RFD).

**Table S3.** ICCs (95% confidence limit, lower limit-LL, upper limit-UL) of sEMG values recorded during bilateral MVICs.

| Variable                                    | ACL Group                 |                         | Control Group             |                  |
|---------------------------------------------|---------------------------|-------------------------|---------------------------|------------------|
|                                             | <i>Bilateral Exercise</i> |                         | <i>Bilateral Exercise</i> |                  |
|                                             | <i>Operated Leg</i>       | <i>Non-Operated Leg</i> | <i>Right Leg</i>          | <i>Left Leg</i>  |
| <b>sEMG<sub>RMS</sub> relative to MVICs</b> |                           |                         |                           |                  |
| <b>VL</b>                                   | 0.98 (0.93-0.99)          | 0.78 (0.44-0.93)        | 0.87 (0.65-0.96)          | 0.97 (0.90-0.99) |
| <b>VM</b>                                   | 0.93 (0.79-0.98)          | 0.88 (0.77-0.96)        | 0.93 (0.80-0.98)          | 0.97 (0.90-0.99) |
| <b>RF</b>                                   | 0.81 (0.47-0.94)          | 0.98 (0.94-0.99)        | 0.75 (0.38-0.92)          | 0.92 (0.77-0.97) |
| <b>BF</b>                                   | 0.94 (0.83-0.98)          | 0.98 (0.93-0.99)        | 0.98 (0.93-0.99)          | 0.92 (0.78-0.98) |
| <b>sEMG<sub>RMS</sub> relative to RFD</b>   |                           |                         |                           |                  |
| <b>VL</b>                                   | 0.93 (0.80-0.98)          | 0.87 (0.63-0.96)        | 0.93 (0.79-0.98)          | 0.91 (0.73-0.97) |
| <b>VM</b>                                   | 0.89 (0.70-0.97)          | 0.92 (0.77-0.97)        | 0.94 (0.83-0.98)          | 0.96 (0.87-0.99) |
| <b>RF</b>                                   | 0.89 (0.68-0.97)          | 0.95 (0.84-0.99)        | 0.81 (0.51-0.94)          | 0.81 (0.49-0.93) |
| <b>BF</b>                                   | 0.89 (0.60-0.97)          | 0.91 (0.72-0.97)        | 0.81 (0.51-0.94)          | 0.88 (0.67-0.96) |

Abbreviations: maximal voluntary isometric contractions (MVICs), vastus lateralis (VL), vastus medialis (VM), rectus femoris (RF), biceps femoris (BF) and rate of force development (RFD).
